# Supplementary material for: DFT insights into the electronic structure, mechanical behaviour, lattice dynamics and defect processes in the first Sc-based MAX phase Sc2SnC
Source: Research Square preprint supplement (doi:10.21203/rs.3.rs-870934/v1), 2021-09-08
Supplement: Supplementary file 1 [file 1505900e74eb46faf9f630a4.docx]

Supplementary Information

DFT insights into the electronic structure, mechanical behaviour, lattice dynamics and defect processes in the first Sc-based MAX phase Sc2SnC

**M.A. Hadi1*, S.-R.G. Christopoulos2, A. Chroneos3,4, S.H. Naqib1, A.K.M.A. Islam1,5**

1Department of Physics, University of Rajshahi, Rajshahi 6205, Bangladesh

2Faculty of Engineering, Environment and Computing, Coventry University, Priory Street, Coventry CV1 5FB, UK

3Department of Electrical and Computer Engineering, University of Thessaly, 38221 Volos, Greece

4Department of Materials, Imperial College, London SW7 2AZ, UK

5International Islamic University Chittagong, Kumira, Chittagong-4318, Bangladesh

**Correspondence:* [*hadipab@gmail.com*](mailto:hadipab@gmail.com)

**Table** **S1**. Lattice parameters (*a*, *c*, *z*M in Å), hexagonal ratio (*c*/*a*) and cell volume (*V* in Å3) of Sc2SnC and existing M2SnC MAX phases.

| Compound | *a* | *c* | *c*/*a* | *z*M | *V* | Remarks |
| --- | --- | --- | --- | --- | --- | --- |
| Sc2SnC | 3.373 | 14.854 | 4.403 | 0.5814 | 146.4 | Calc.This |
|  | 3.368 | 14.653 | 4.351 | 0.5786 | 143.9 | Expt.1 |
| V2SnC | 3.121 | 12.947 | 4.148 | 0.0759 | 109.2 | Calc.2 |
| 2.9792 | 13.4441 | 4.513 | 0.0744 | 103.3 | Expt.3 |
| Ti2SnC | 3.172 | 13.772 | 4.342 | 0.0806 | 120.0 | Calc.4 |
| 3.1635 | 13.675 | 4.323 | --------- | 118.5 | Expt.5 |
| Nb2SnC | 3.258 | 13.918 | 4.272 | 0.0820 | 128.0 | Calc.4 |
| 3.2408 | 13.802 | 4.259 | --------- | 125.5 | Expt.5 |
| Hf2SnC | 3.367 | 14.548 | 4.320 | 0.0865 | 142.9 | Calc.4 |
| 3.3199 | 14.388 | 4.334 | --------- | 137.3 | Expt.5 |
| Zr2SnC | 3.367 | 14.730 | 4.374 | 0.0849 | 144.7 | Calc.4 |
| 3.3576 | 14.568 | 4.339 | --------- | 142.2 | Expt.5 |
| Lu2SnC | 3.546 | 15.323 | 4.320 | 0.0850 | 166.9 | Calc.4 |
| 3.514 | 15.159 | 4.314 | --------- | 162.1 | Expt.5 |

**Table S2**. Effective valence charge, bond population and bond length of M2SnC MAX phases

|  | Sc2SnC | Ti2SnC | V2SnC | Zr2SnC | Nb2SnC | Lu2SnC | Hf2SnC |
| --- | --- | --- | --- | --- | --- | --- | --- |
| Atom | Effective valence charge (e) | | | | | | |
| M | 2.47 | 3.58 | 3.68 | 3.57 | 4.69 | 2.55 | 3.72 |
| Sn | 3.79 | 3.89 | 3.99 | 3.93 | 3.93 | 3.54 | 3.69 |
| C | 3.15 | 3.22 | 3.36 | 3.22 | 3.32 | 3.57 | 3.14 |
| Bond | Bond population | | | | | | |
| M-C | 1.17 | 1.08 | 1.02 | 1.05 | 0.99 | –6.25 | 1.39 |
| M-M | –0.52 | –0.34 | –0.42 | –0.09 | –0.26 | –3.62 | –0.31 |
| M-Sn | 0.14 | –0.35 | –0.35 | –0.66 | –1.03 | –1.16 | –0.16 |
| Sn-C | –0.13 | –0.13 | –0.18 | –0.05 | –0.05 | 0.12 | –0.19 |
| Bond | Bond length (Å) | | | | | | |
| M-C | 2.293 | 2.141 | 2.053 | 2.312 | 2.200 | 2.428 | 2.316 |
| M-M | 3.106 | 2.878 | 2.667 | 3.168 | 2.958 | 3.314 | 3.180 |
| M-Sn | 3.172 | 2.966 | 2.886 | 3.113 | 3.001 | 3.255 | 3.071 |
| Sn-C | 4.193 | 3.900 | 3.705 | 4.163 | 3.955 | 4.345 | 4.123 |

**Table S3**. Elastic constants *C*ij and moduli *B*, *G*, *E* in GPa and Poisson’s and Pugh’s ratio *v* and *B*/*G* of Sc2SnC including M2SnC2,4.

| Phases | *C*11 | *C*33 | *C*44 | *C*66 | *C*12 | *C*13 | *B* | *G* | *E* | *v* | *B*/*G* |
| --- | --- | --- | --- | --- | --- | --- | --- | --- | --- | --- | --- |
| Sc2SnC | 187 | 184 | 61 | 64 | 59 | 43 | 94 | 65 | 158 | 0.220 | 1.455 |
| Ti2SnC | 268 | 265 | 100 | 95 | 79 | 74 | 139 | 97 | 236 | 0.213 | 1.406 |
| V2SnC | 243 | 300 | 87 | 84 | 76 | 124 | 156 | 82 | 209 | 0.278 | 1.914 |
| Zr2SnC | 230 | 232 | 94 | 84 | 62 | 91 | 131 | 83 | 206 | 0.236 | 1.560 |
| Nb2SnC | 255 | 236 | 94 | 77 | 102 | 122 | 160 | 78 | 217 | 0.280 | 1.944 |
| Lu2SnC | 172 | 173 | 56 | 64 | 46 | 36 | 82 | 61 | 152 | 0.206 | 1.370 |
| Hf2SnC | 251 | 238 | 101 | 90 | 71 | 107 | 145 | 87 | 216 | 0.252 | 1.681 |

**Table S4**. Elastic anisotropy factors of Sc3SnC including existing M2SnC2,4 MAX phases.

| Phases | *A*1 | *A*2 | *A*3 | *k*c/*k*a | *AB%* | *AG%* | *AU* |
| --- | --- | --- | --- | --- | --- | --- | --- |
| Sc2SnC | 1.2077 | 0.9531 | 1.1510 | 1.1348 | 0.1085 | 0.2482 | 0.0271 |
| Ti2SnC | 0.9683 | 1.0582 | 1.0247 | 1.0419 | 0.0011 | 0.0284 | 0.0025 |
| V2SnC | 0.8103 | 1.0419 | 0.8443 | 0.4034 | 1.8476 | 0.7283 | 0.1110 |
| Zr2SnC | 0.6950 | 1.1190 | 0.7778 | 0.7801 | 0.2353 | 1.0100 | 0.1067 |
| Nb2SnC | 0.6046 | 1.2288 | 0.7429 | 0.9912 | 0.0926 | 1.4360 | 0.1475 |
| Lu2SnC | 1.2500 | 0.8889 | 1.1111 | 1.0657 | 0.0068 | 0.4086 | 0.0412 |
| Hf2SnC | 0.6106 | 1.1222 | 0.6852 | 0.8244 | 0.1637 | 1.5501 | 0.1607 |

**Table** **S5.** Bond number *nμ*, bond length, *d*μ (Å), bond population *P*μ, bond volume (Å3), bond hardness (GPa), metallic population *P*μ′, and hardness (GPa) of Sc2SnC and existing M2SnC MAX phases.

| Compound | Bond | *n*μ | *d*μ | *P*μ | *P*μ′ |  |  | *H*V | *H*V (expt.) |
| --- | --- | --- | --- | --- | --- | --- | --- | --- | --- |
| Sc2SnC | Sc-C | 4 | 2.2927 | 1.17 | 0.00568 | 36.60 | 2.1 | 2.1 |  |
| Ti2SnC | Ti–C | 4 | 2.1414 | 1.08 | 0.01525 | 30.00 | 2.7 | 2.7 | 3.55, 3.56 |
| V2SnC | V–C | 4 | 2.0526 | 1.02 | 0.05432 | 27.30 | 2.9 | 2.9 |  |
| Zr2SnC | Zr–C | 4 | 2.3118 | 1.05 | 0.01302 | 36.18 | 1.9 | 1.9 | 3.55, 3.96 |
| Nb2SnC | Nb–C | 4 | 2.2014 | 0.99 | 0.00139 | 31.98 | 2.3 | 2.3 | 3.86, 3.56 |
| Lu2SnC | Sn–C | 4 | 4.3478 | 0.12 | 0.00348 | 41.82 | 0.2 | 0.2 |  |
| Hf2SnC | Hf–C | 4 | 2.3158 | 1.39 | 0.00541 | 35.73 | 2.6 | 2.6 | 3.85, 4.56 |

**Table S6**. Sound velocities in km/s, Debye temperature and melting point in K, minimum and room temperature lattice thermal conductivity in W/m-K of Sc2SnC and existing M2SnC2,4 MAX phases.

| Phases | *ρ* | *vl* | *vt* | *vm* | *θ*D | *T*m |  | *κ*ph* |
| --- | --- | --- | --- | --- | --- | --- | --- | --- |
| Sc2SnC | 5.005 | 6.004 | 3.596 | 3.978 | 449 | 1191 | 0.79 | 09.60 |
| Ti2SnC | 6.346 | 6.503 | 3.910 | 4.325 | 525 | 1556 | 0.99 | 29.98 |
| V2SnC | 7.073 | 6.125 | 3.405 | 3.792 | 472 | 1533 | 1.20 | 14.38 |
| Zr2SnC | 7.313 | 5.749 | 3.369 | 3.735 | 426 | 1392 | 0.76 | 20.61 |
| Nb2SnC | 8.369 | 5.616 | 3.053 | 3.469 | 412 | 1473 | 0.76 | 12.38 |
| Lu2SnC | 9.847 | 4.073 | 2.489 | 2.748 | 300 | 1130 | 0.51 | 14.91 |
| Hf2SnC | 11.796 | 4.704 | 2.716 | 3.015 | 348 | 1464 | 0.63 | 15.92 |

**References**

1. Li Youbing, Q. Y., Chen Ke, Chen Lu, Zhang Xiao, Ding Haoming, Li Mian, Zhang Yiming, Du Shiyu, Chai Zhifang, Huang Qing. Molten Salt Synthesis of Nanolaminated Sc2SnC MAX Phase. *Journal of Inorganic Materials* **36**, 773–778 (2021).
2. Hadi, M. A. *et al.* Chemically stable new MAX phase V2SnC: a damage and radiation tolerant TBC material. *RSC Adv.* **10**, 43783–43798 (2020).
3. Xu, Q. *et al.* Theoretical prediction, synthesis, and crystal structure determination of new MAX phase compound V2SnC. *Journal of Advanced Ceramics* **9**, 481–492 (2020).
4. Hadi, M. A., Kelaidis, N., Naqib, S. H., Chroneos, A. & Islam, A. K. M. A. Mechanical behaviors, lattice thermal conductivity and vibrational properties of a new MAX phase Lu2SnC. *Journal of Physics and Chemistry of Solids* **129**, 162–171 (2019).
5. Barsoum, M. W., Yaroschuk, G. & Tyagi, S. Fabrication and characterization of M2SnC (M = Ti, Zr, Hf and Nb). *Scripta Materialia* **37**, 1583–1591 (1997).
6. El-Raghy, T., Chakraborty, S. & Barsoum, M. W. Synthesis and characterization of Hf2PbC, Zr2PbC and M2SnC (M=Ti, Hf, Nb or Zr). *Journal of the European Ceramic Society* **20**, 2619–2625 (2000).
